# Supplementary material for: Barley-ß-glucans reduce systemic inflammation, renal injury and aortic calcification through ADAM17 and neutral-sphingomyelinase2 inhibition
Source: PubMed Central journal article supplement (PMC6882851; doi:10.1038/s41598-019-54306-8), 2019-11-28

**Barley- $\beta$ -glucans reduce systemic inflammation, renal injury and aortic calcification through ADAM17 and neutral-sphingomyelinase2 inhibition.**

**Authors and affiliations: Maria Vittoria Arcidiacono, PhD<sup>1,\*</sup>; Natalia Carrillo-López, PhD<sup>2,\*</sup>; Sara Panizo, PhD<sup>2,\*</sup>; Anabel L. Castro-Grattoni, MS<sup>1^</sup>; Petya Valcheva, PhD<sup>1^</sup>; Catalina Ulloa, MD<sup>3^</sup>; Javier Rodríguez-Carrio, PhD<sup>2,4</sup>; Anna Cardús, PhD<sup>1,5</sup>; Covadonga Quirós-Caso, PhD<sup>4</sup>; Laura Martínez-Arias, MS<sup>4</sup>; Carlos Martínez-Salgado, PhD<sup>6</sup>; María José Motilva, PhD<sup>7</sup>; Carmen Rodríguez-Suarez, MD<sup>5</sup>, Jorge B. Cannata-Andía, MD, PhD<sup>2,8#</sup> and Adriana S. Dusso, PhD<sup>1,2#</sup>.**

<sup>1</sup>*Division of Experimental Nephrology, IRBLleida, Lleida, Spain.*

<sup>2</sup>*Bone and Mineral Research Unit, Hospital Universitario Central de Asturias, Instituto de Investigación Sanitaria del Principado de Asturias (ISPA), REDinREN-ISCIII, Oviedo, Spain.*

<sup>3</sup>*Division of Nephrology, Hospital Universitario Central de Asturias. Oviedo, Spain.*

<sup>4</sup>*Area of Immunology, Department of Functional Biology, Universidad de Oviedo, Oviedo, Spain.*

<sup>5</sup>*Division of Infection & Immunity, School of Medicine, Cardiff University, Cardiff, Wales, UK.*

<sup>6</sup>*Department of Physiology and Pharmacology, University of Salamanca, IECSCYL, Instituto Biosanitario de Salamanca (IBSAL), REDinREN-ISCIII, Salamanca, Spain.*

<sup>7</sup>*Department of Food Science and Technology, Agrotecnio Research Center, Lleida University, Lleida, Spain.*

<sup>8</sup>*Departamento de Medicina, Universidad de Oviedo, Oviedo, Spain.*

\*Equal contribution as first authors

<sup>^</sup>Equal contribution as second authors

<sup>#</sup>Equal contribution as senior authors

**Supplementary Table 1.** Primary antibodies and dilutions used for immunohistochemistry (IHC) or immunofluorescence (IF).

| <b>Primary antibody</b> | <b>Dilution</b> | <b>Technique</b> | <b>Comercial</b>         |
|-------------------------|-----------------|------------------|--------------------------|
| Rabbit anti-ADAM17      | 1:400           | IHC              | EMD Millipore (#Ab19027) |
| Rabbit anti-ADAM17      | 1:100           | IF               | EMD Millipore (#Ab19027) |
| Rabbit anti-CD45        | 1:50            | IHC              | Abcam plc (#ab10558)     |
| Mouse anti-Klotho       | 1:100           | IHC              | R&D Systems (#AF1819)    |

**Supplementary Figure 1.** Dietary B $\beta$ glucans inhibit mitochondrial superoxide production in circulating leukocytes from healthy adults. Box plot analyses of changes in baseline superoxide production in peripheral blood leukocytes from 10 healthy adults ingesting 3 g of B $\beta$ glucans daily, as slices of barley bread, during 4 weeks. \* $p < 0.05$  and \*\* $p < 0.01$  vs. Baseline, # $p < 0.05$  vs. 1 week. White circles mark the 5 patients that complied with the 3 g daily intake of B $\beta$ glucans for 4 weeks.

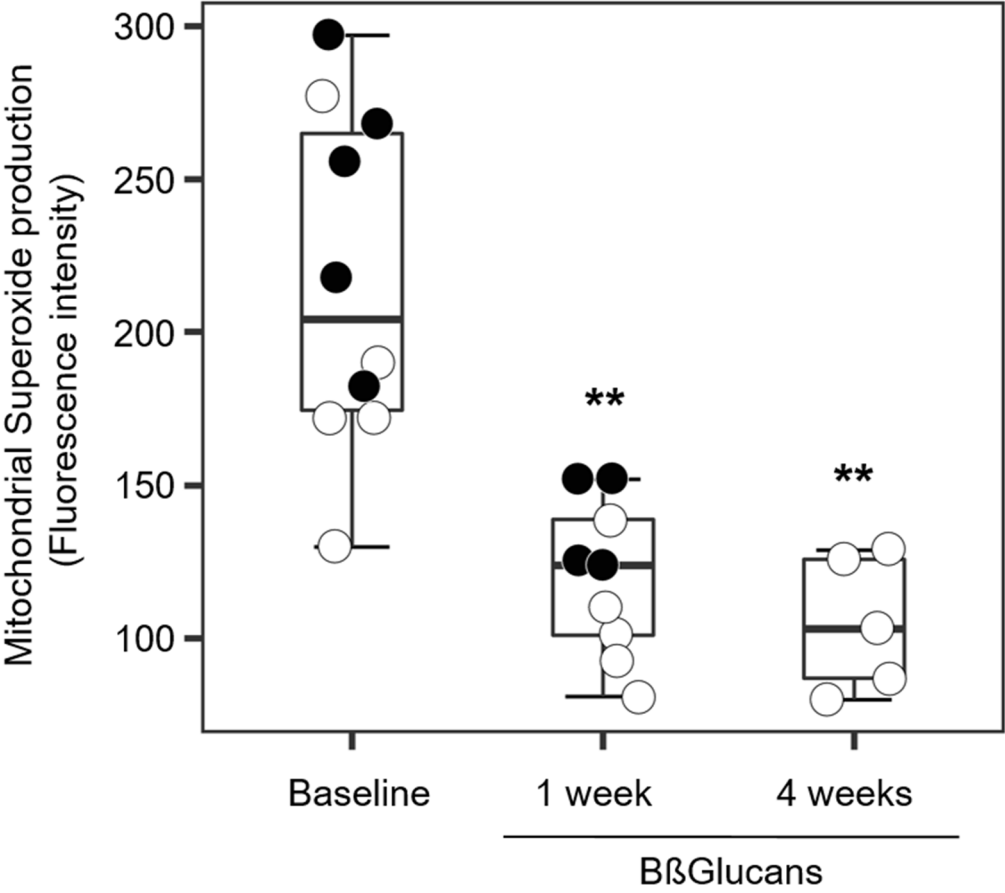

**Supplementary Figure 2.** Anti-oxidant properties of B $\beta$ Glucans in immune cells. Mitochondrial superoxide production (expressed as percentage of baseline conditions) by Raw264.7 cells exposed for 16 hours to vehicle (CONTROL), 100 $\mu$ g/mL B $\beta$ Glucans (B $\beta$ Glucans), 5 $\mu$ g/mL LPS (LPS) or the combination (LPS+B $\beta$ Glucans). Bars and error bars represent mean $\pm$ SD from three independent experiments performed in triplicate per experimental condition. \*\*p<0.01 vs. CONTROL; #p<0.01 vs. LPS.

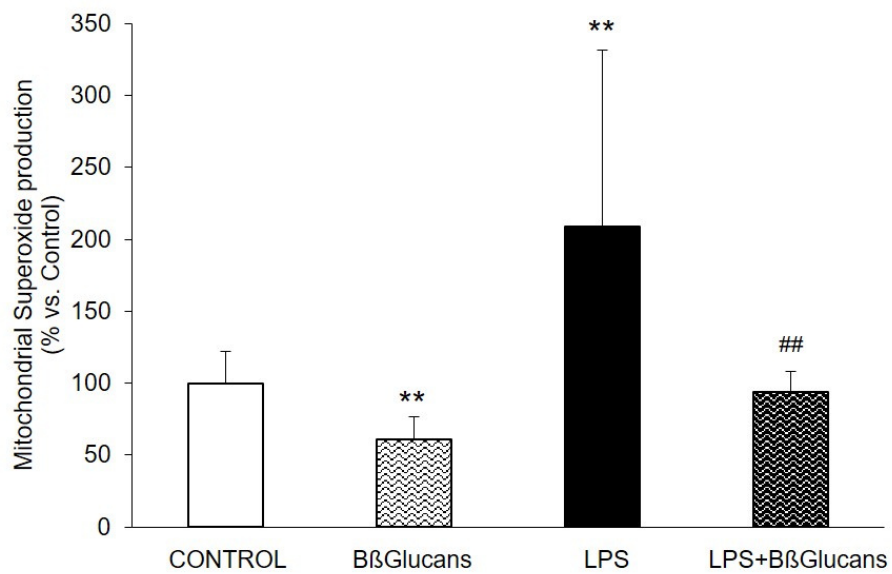

Supplement: 41598_2019_54306_MOESM1_ESM.pdf [file 41598_2019_54306_MOESM1_ESM.pdf]
